# Supplementary material for: De novo post-SELEX optimization of a G-quadruplex DNA aptamer binding to marine toxin gonyautoxin 1/4
Source: PubMed Central journal article supplement — Comput Struct Biotechnol J. 2020 Nov 10;18:3425–33. doi: 10.1016/j.csbj.2020.10.041 (PMC7689369; doi:10.1016/j.csbj.2020.10.041), 2020-11-10
Supplement: mmc1.pdf [file mmc1.pdf]

## Supplementary Information

### ***De novo* post-SELEX optimization of a G-quadruplex DNA aptamer binding to marine toxin gonyautoxin 1/4**

Menghua Song<sup>a,†</sup>, Gan Li<sup>a,†</sup>, Qi Zhang<sup>a,†</sup>, Jianping Liu<sup>a,\*</sup> and Qiang Huang<sup>a,b,\*</sup>

*<sup>a</sup>State Key Laboratory of Genetic Engineering, Shanghai Engineering Research Center of Industrial Microorganisms, MOE Engineering Research Center of Gene Technology, School of Life Sciences, Fudan University, Shanghai 200438, China*

*<sup>b</sup>Multiscale Research Institute of Complex Systems, Fudan University, Shanghai 201203, China*

<sup>†</sup>These first three authors contributed equally to this work.

\*Corresponding authors. Email address: [huangqiang@fudan.edu.cn](mailto:huangqiang@fudan.edu.cn) (Q. Huang), [jpliu@fudan.edu.cn](mailto:jpliu@fudan.edu.cn) (J. Liu)

## Figures

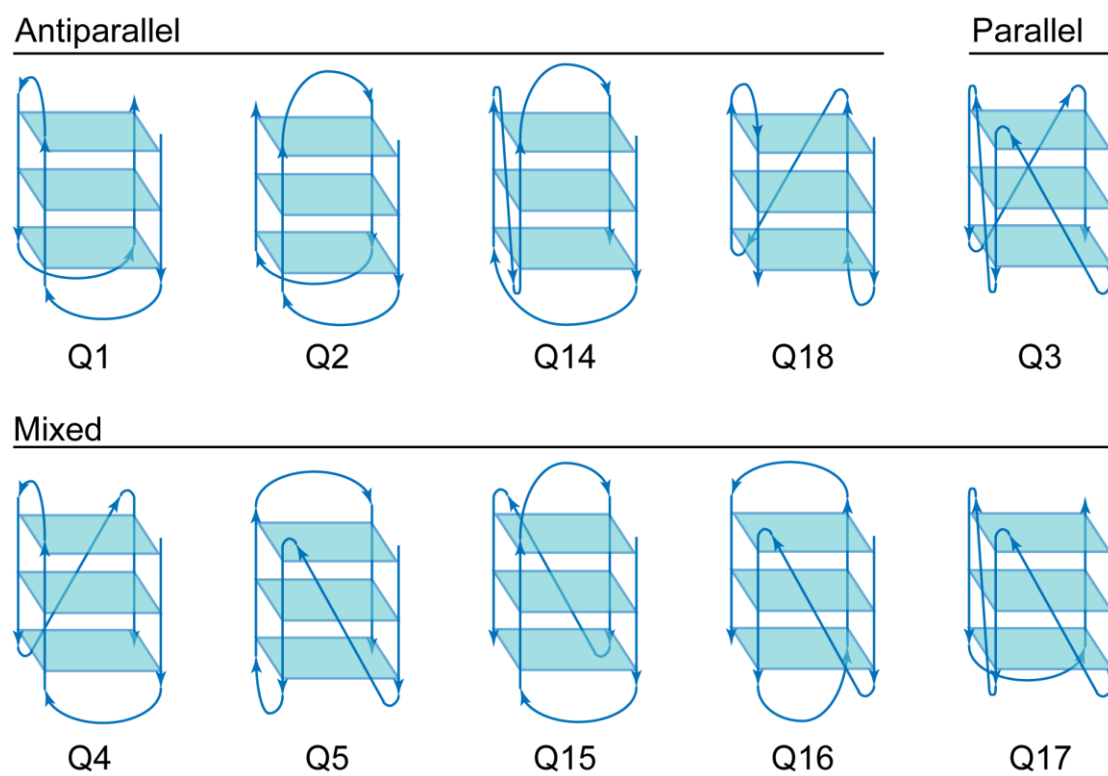

**Fig. S1.** Strand orientation in different GQ types. Q1, Q2, Q14 and Q18 are antiparallel types; Q3 is parallel type; Q4, Q5, Q15, Q16 and Q17 are mixed types.

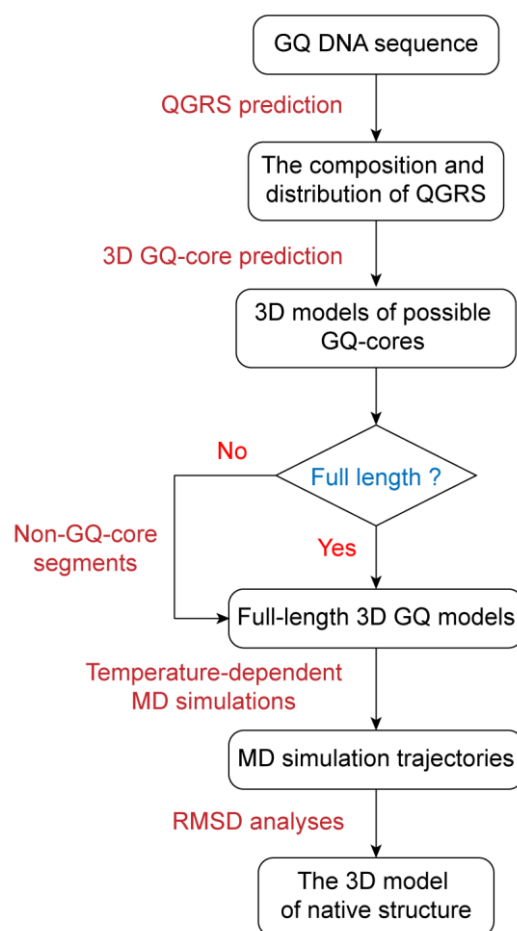

**Fig. S2.** 3D structure prediction pipeline of GQ aptamers. QGRS prediction is performed via the QGRS Mapper web server (<http://bioinformatics.ramapo.edu/QGRS/analyze.php>). 3D GQ-core models are predicted with the G-Quadruplex module of the 3D-Nus web server (<https://www.iith.ac.in/3dnus/Quadruplex.html>). Non-GQ-core segments are extended with the AutoPSF VMD plugin (<https://www.ks.uiuc.edu/Research/vmd/>).

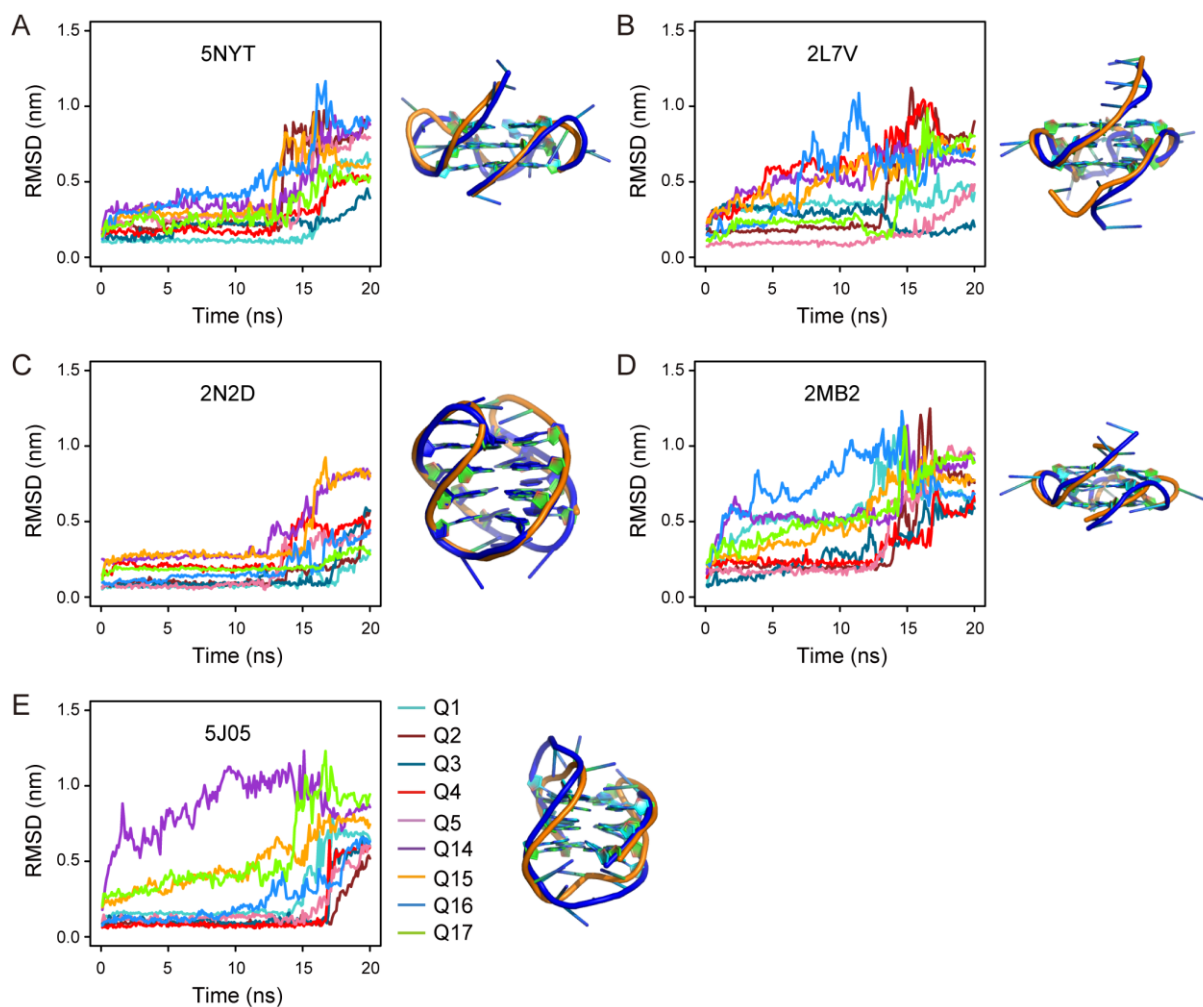

**Fig. S3.** Time-dependent RMSDs of the G-tetrad guanines in the TdMD simulations. PDB IDs of the experimental structures of GQ aptamers are given as: **(A)** 5NYT [1], **(B)** 2L7V [2], **(C)** 2N2D [3], **(D)** 2MB2 [4] and **(E)** 5J05 [5]. The experimental structures are shown in orange, and corresponding predicted structures in blue. For each simulation, the initial structure of the given aptamer is the reference of the RMSD calculations.

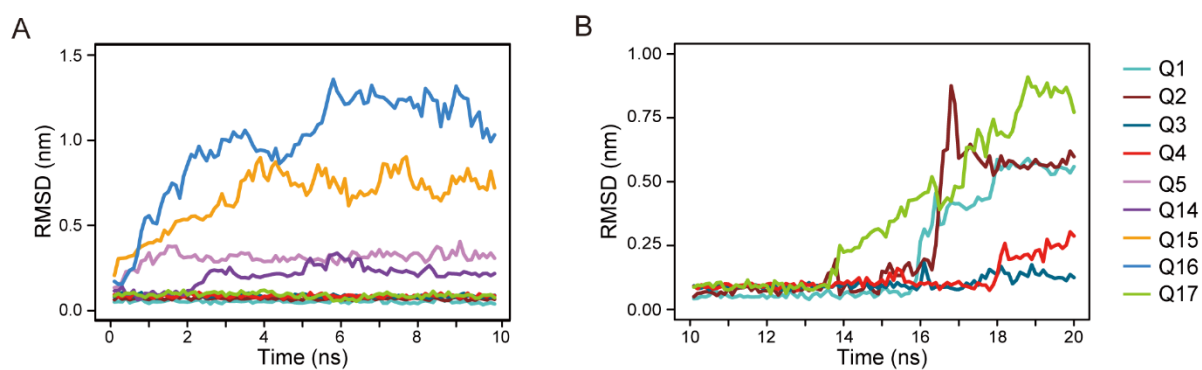

**Fig. S4.** RMSD analyses for the possible full-length models of GO18-T-d. **(A)** Time-dependent RMSDs of 8 G-tetrad guanines in the constant-temperature MD simulations. **(B)** Time-dependent RMSDs of 8 G-tetrad guanines in the heating simulations. For each simulation, the initial structure of the given aptamer is the reference of the RMSD calculations.

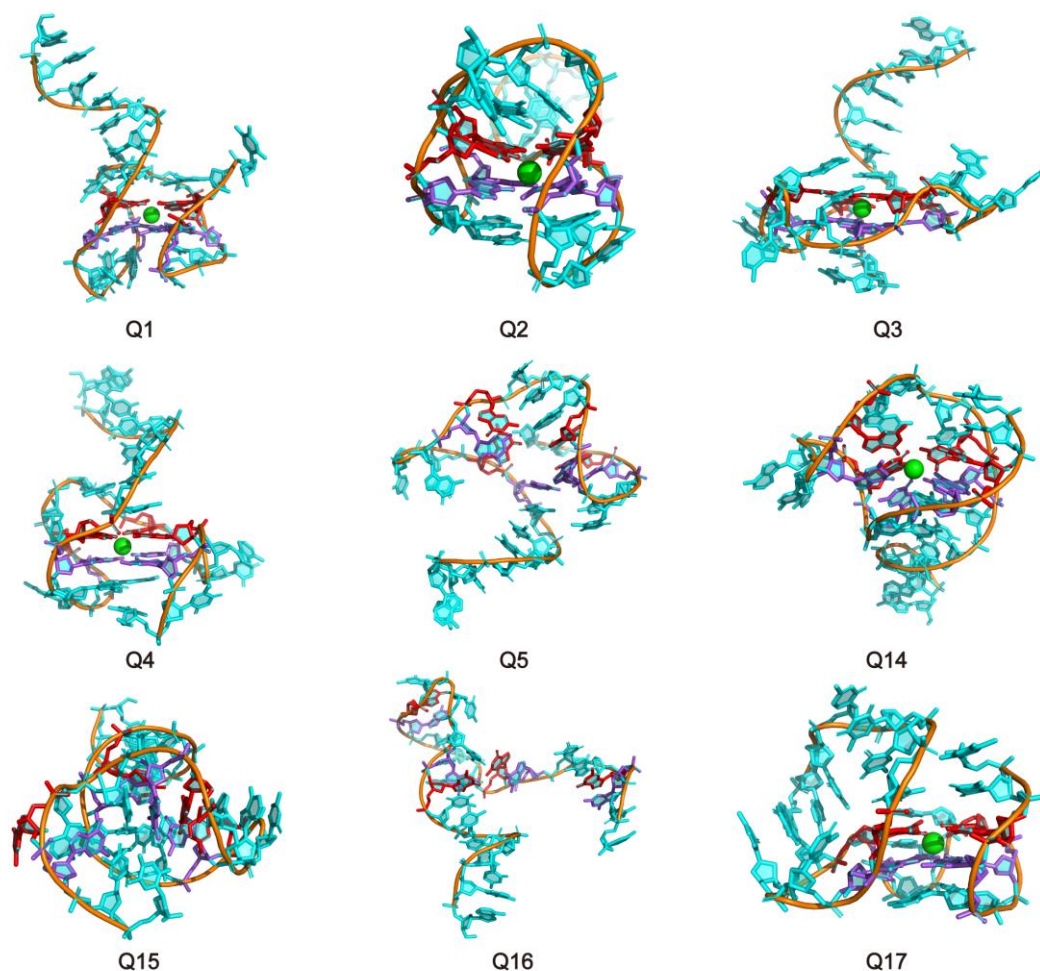

**Fig. S5.** MD conformations of the GO18-T-d models at the end of the constant-temperature simulations. The aptamer is shown as cartoon and sticks in cyan, the G-tetrads as cartoon and sticks in red/purple, and  $Mg^{2+}$  as spheres in green.

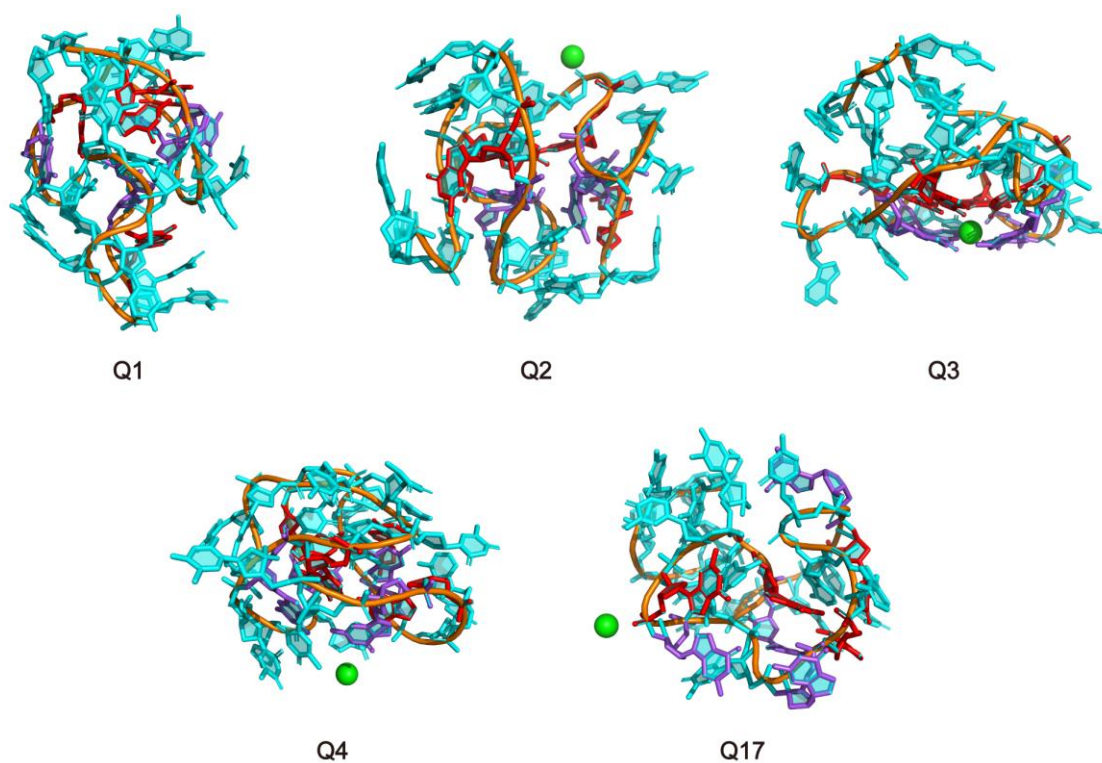

**Fig. S6.** MD conformations of the GO18-T-d models at the end of the heating simulations. The aptamer is shown as cartoon and sticks in cyan, the G-tetrads as cartoon and sticks in red/purple, and  $Mg^{2+}$  as spheres in green.

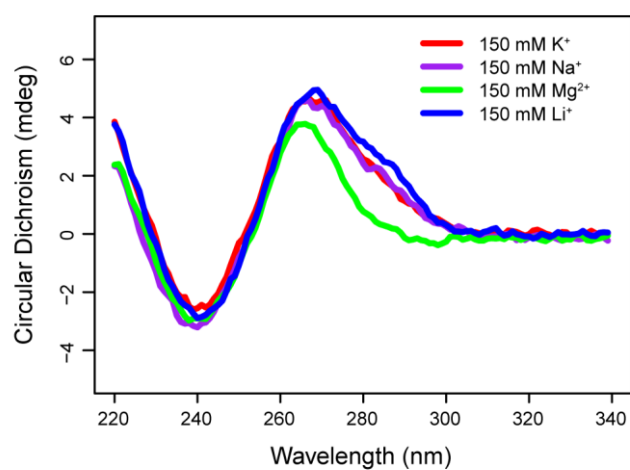

**Fig. S7.** CD spectra of GO18-T-d in the presence of different cations. The aptamer was annealed directly in the buffers (20 mM Tris-HCl, pH 7.4) with ions.

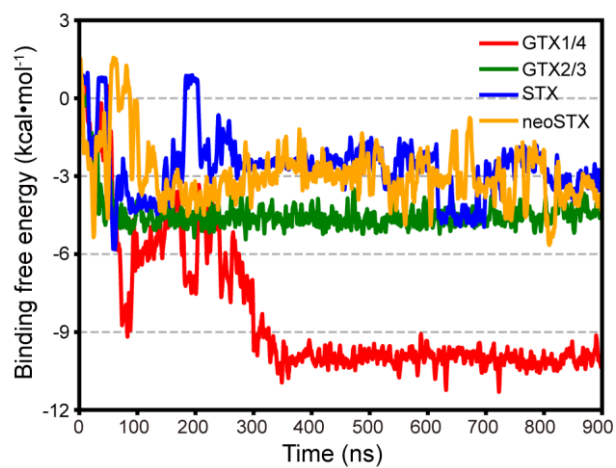

**Fig. S8.** Time-dependent binding free energies of GO18-T-d in complex with different toxins (red: GTX1/4, green: GTX2/3, blue: STX, orange: neoSTX).

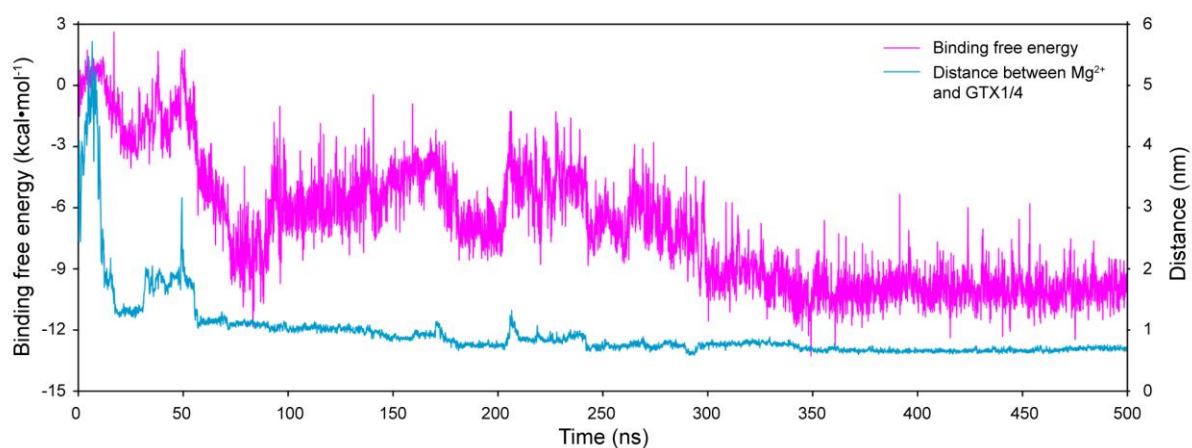

**Fig. S9.** Time-dependent binding free energy and distance between the center of GTX1/4 and  $Mg^{2+}$  in the center of GQ-core.

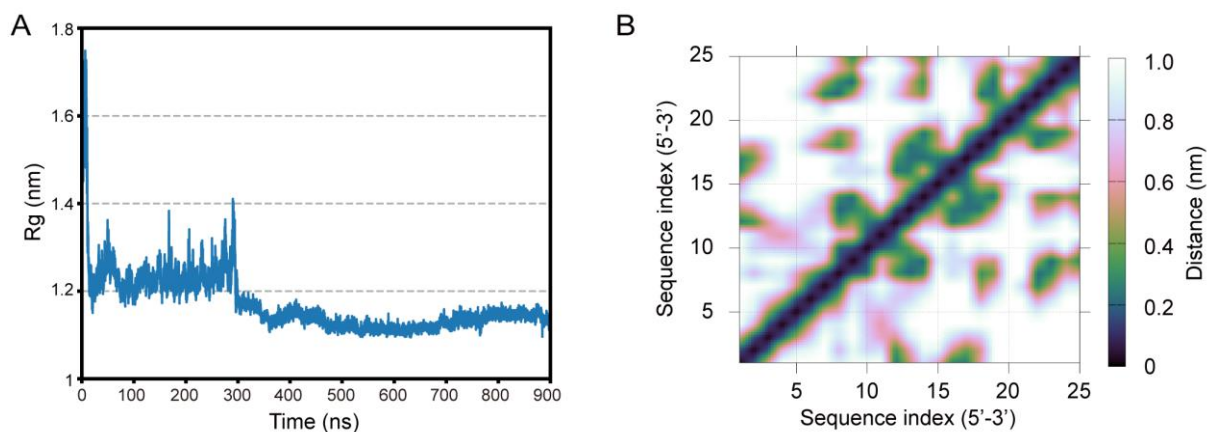

**Fig. S10.** (A) Time-dependent gyration radius ( $R_g$ ) of GO18-T-d:GTX1/4. (B) The contact map of GO18-T-d in the GO18-T-d:GTX1/4 system.

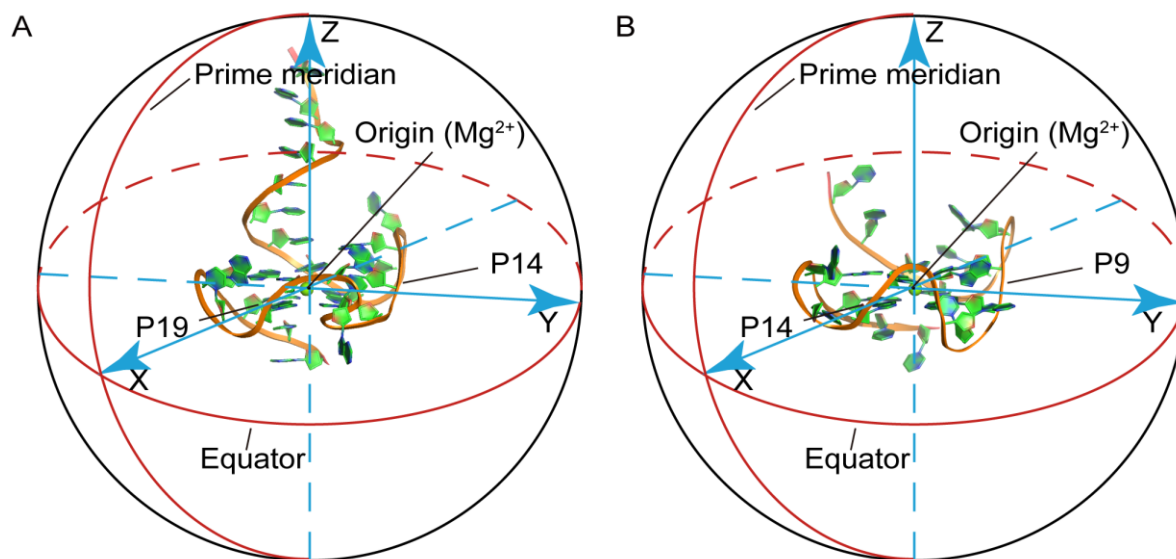

**Fig. S11.** The spherical coordinate system for constructing the binding free energy landscapes of (A) GO18-T-d and (B) tGO18-T-d.



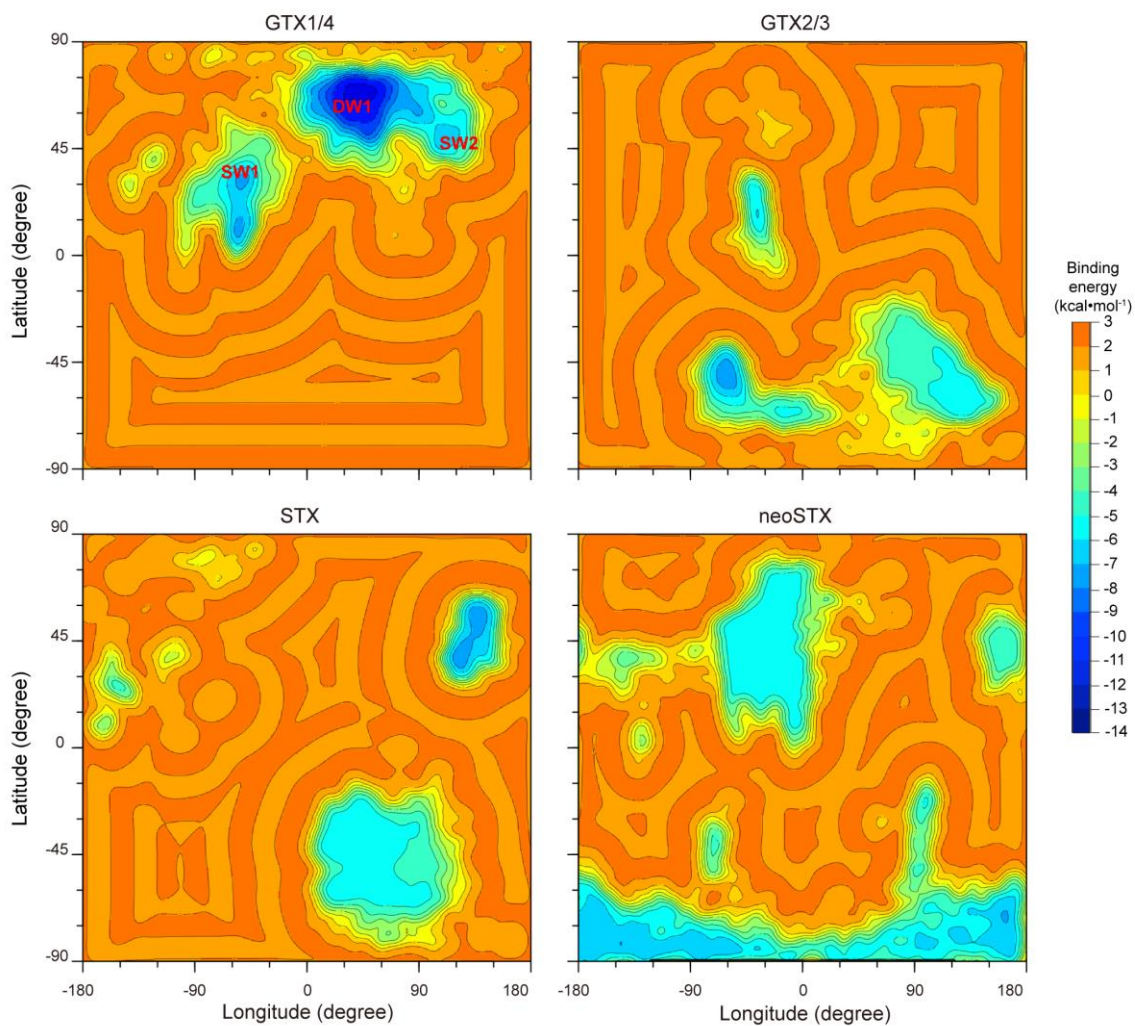

**Fig. S12.** The binding energy landscape of four toxin:GO18-T-d systems.

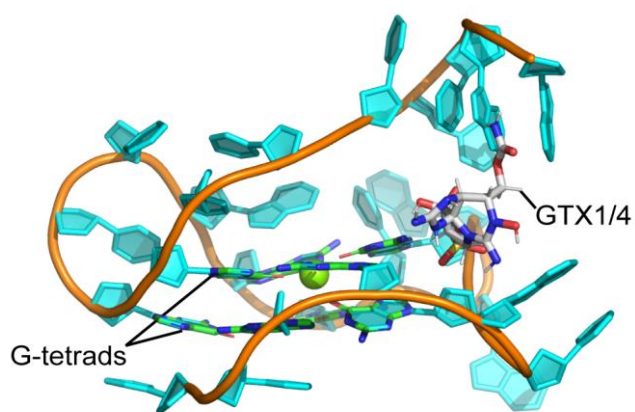

**Fig. S13.** A representative complex structure that illustrates the 5'-end of GO18-T-d hampers the entry of GTX1/4 into the binding pocket of GO18-T-d.

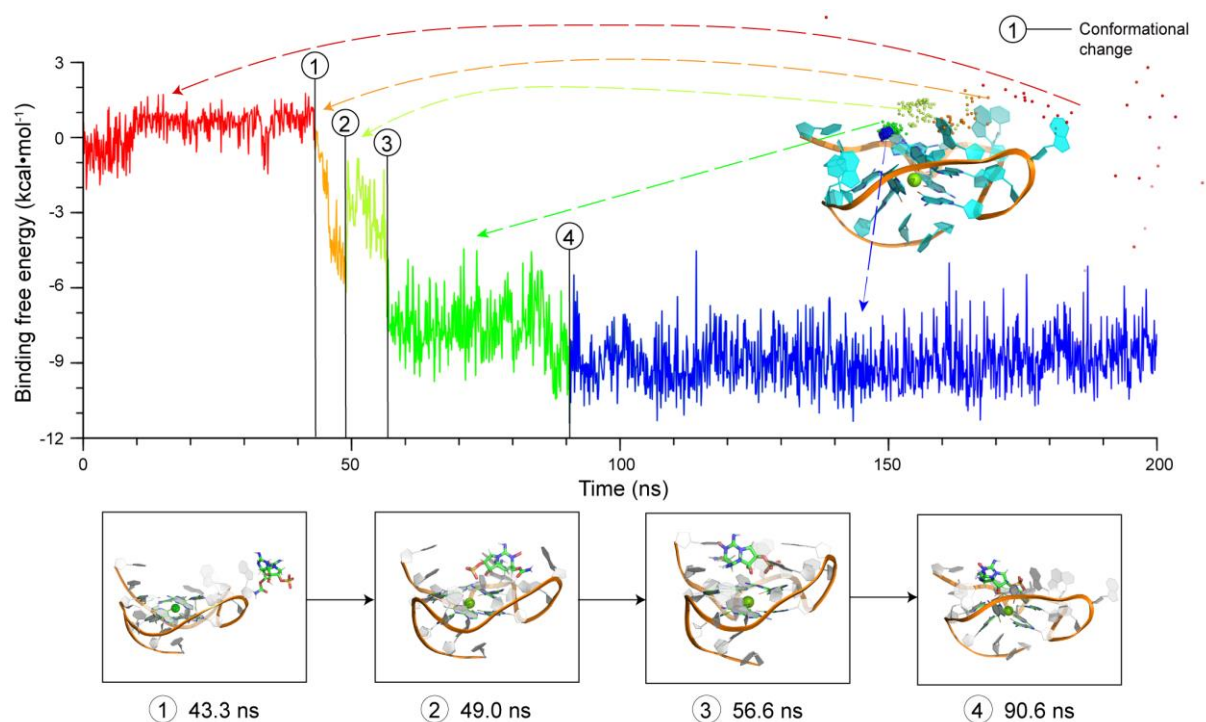

**Fig. S14.** Spontaneous association of GTX1/4 with tGO18-T-d. Time-dependent binding free energies of the tGO18-T-d:GTX1/4 complex, and corresponding positions of the center of mass of GTX1/4 (spheres in rainbow colors) on tGO18-T-d. Four representative conformational changes are given in the panels below. Corresponding movie showing the spontaneous association process is presented in Supplementary Movie S2.

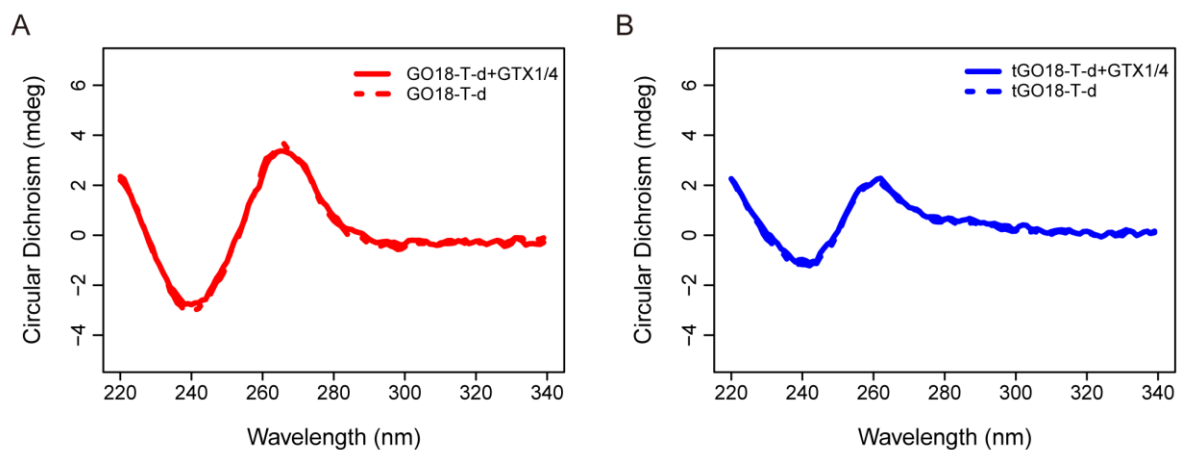

**Fig. S15.** CD spectra of GO18-T-d (A) and tGO18-T-d (B) in the presence (solid line) and absence (dash line) of GTX1/4 (1  $\mu$ M). The aptamers (20  $\mu$ M) were annealed directly in the buffer (20 mM Tris-HCl, pH 7.4) with 150 mM MgCl<sub>2</sub>.

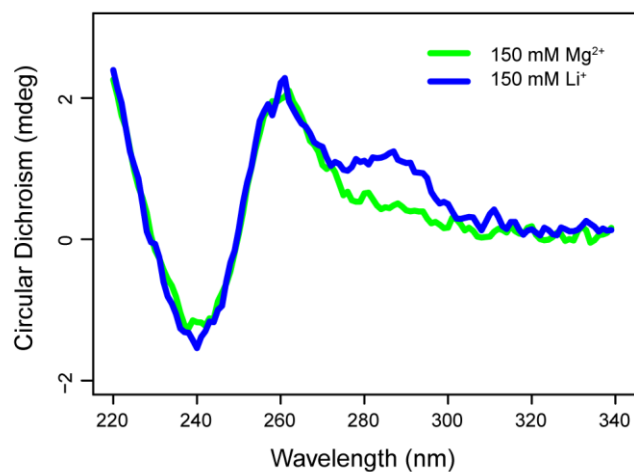

**Fig. S16.** CD spectra of tGO18-T-d in the presence of different cations. The aptamer was annealed directly in the buffers (20 mM Tris-HCl, pH 7.4) with ions.

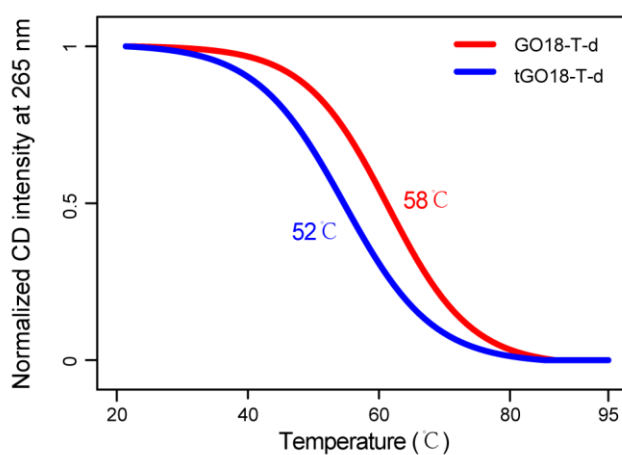

**Fig. S17.** Normalized CD intensity at 265 nm with increasing temperatures. The aptamers (20  $\mu$ M) were annealed directly in the ionic buffer. The buffer is (20 mM Tris-HCl, pH 7.4) supplemented with 150 mM  $\text{MgCl}_2$ .

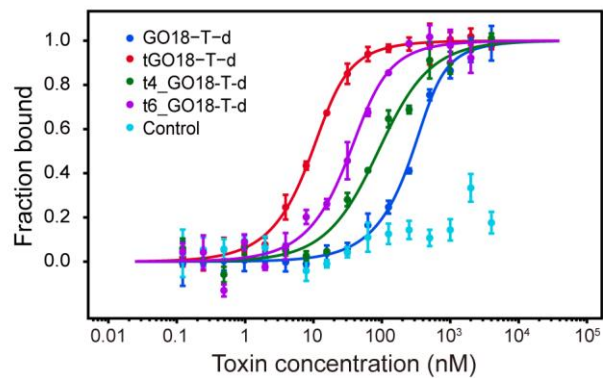

**Fig. S18.** MST experiments for GO18-T-d (blue), tGO18-T-d (red), t4\_GO18-T-d (green), t6\_GO18-T-d (purple) and Control (random sequence, cyan). The K<sub>d</sub> values of GO18-T-d, tGO18-T-d, t4\_GO18-T-d and t6\_GO18-T-d are 75.63 ± 25.33 nM, 3.60 ± 0.67 nM, 68.66 ± 32.98 nM and 14.72 ± 10.02 nM, respectively. The control shows no binding affinity for GTX1/4.

## Tables

**Table S1.** GQ aptamers for testing the structure prediction pipeline.

| <b>PDB ID</b> | <b>Sequence (5' -3')</b> | <b>experimental type</b> | <b>Predicted type</b> | <b>RMSD value (Å)</b> |
|---------------|--------------------------|--------------------------|-----------------------|-----------------------|
| 5NYT          | TAGGGACGGGCGGGCAGGGT     | Q3                       | Q3                    | 1.3                   |
| 2L7V          | TGAGGGTGGGTAGGGTGGGTAA   | Q3                       | Q3                    | 1.5                   |
| 2N2D          | GGGGCCGGGGCCGGGGCCGGGG   | Q1                       | Q1                    | 1.5                   |
| 2MB2          | TTGGGGGGGGGGGGGGGGT      | Q3                       | Q3                    | 3.9                   |
| 5J05          | GGGTTTGGGTTTTGGGAGGG     | Q2                       | Q2                    | 4.0                   |

**Table S2.** Nucleotide sequences of DNA aptamers used in MST and CD experiments.

| <b>Aptamer*</b> | <b>Length (-nt)</b> | <b>DNA Sequence (5' -3')</b> |
|-----------------|---------------------|------------------------------|
| GO18-T-d        | 25                  | AACCTTTGGTCGGGCAAGGTAGGTT    |
| tGO18-T-d       | 20                  | TTGGTCGGGCAAGGTAGGTT         |
| t4_GO18-T-d     | 21                  | TTTGGTCGGGCAAGGTAGGTT        |
| t6_GO18-T-d     | 19                  | TGGTCGGGCAAGGTAGGTT          |
| Control         | 25                  | TCACGAACTTCATTAAGTACTTAC     |

\* Each sequence was labeled with 6-FAM at its 3'-end.

## Movies

**Movie S1.** The spontaneous association of GTX1/4 with GO18-T-d. For the sake of clarity, water molecules, ions in the solvent and hydrogen atoms of GO18-T-d are not shown. In the movie, GO18-T-d is shown as cartoon in cyan, GTX1/4 as spheres and sticks in green, and Mg<sup>2+</sup> as spheres in green.

**Movie S2.** The spontaneous association of GTX1/4 with tGO18-T-d. For the sake of clarity, water molecules, ions in the solvent and hydrogen atoms of tGO18-T-d are not shown. In the movie, tGO18-T-d is shown as cartoon in cyan, GTX1/4 as spheres and sticks in green, and Mg<sup>2+</sup> as spheres in green.

## Reference

1. Trajkovski M, Endoh T, Tateishi-Karimata H, Ohyama T, Tanaka S et al. (2018) Pursuing origins of (poly)ethylene glycol-induced G-quadruplex structural modulations. *Nucleic Acids Res* 46: 4301-4315.
2. Dai J, Carver M, Hurley LH, Yang D (2011) Solution structure of a 2:1 quindoline-c-MYC G-quadruplex: insights into G-quadruplex-interactive small molecule drug design. *J Am Chem Soc* 133: 17673-17680.
3. Brcic J, Plavec J (2015) Solution structure of a DNA quadruplex containing ALS and FTD related GGGGCC repeat stabilized by 8-bromodeoxyguanosine substitution. *Nucleic Acids Res* 43: 8590-8600.
4. Sengar A, Heddi B, Phan AT (2014) Formation of G-quadruplexes in poly-G sequences: structure of a propeller-type parallel-stranded G-quadruplex formed by a G<sub>15</sub> stretch. *Biochemistry* 53: 7718-7723.
5. Dvorkin SA, Karsisiotis AI, Webba da Silva M (2018) Encoding canonical DNA quadruplex structure. *Sci Adv* 4: eaat3007.
